# Supplementary material for: Silicone foams stabilized by surfactants generated in situ from allyl-functionalized PEG
Source: Royal Society of Chemistry journal article supplement (doi:10.1039/b916413h), 2010-01-01

## Silicone Foams Stabilized by Surfactants Generated In Situ from Allyl-Functionalized PEG

Amanda S. Fawcett,<sup>a</sup> Helen Y. So<sup>b</sup> and Michael A. Brook<sup>\*a,b</sup>

### SUPPLEMENTARY INFORMATION

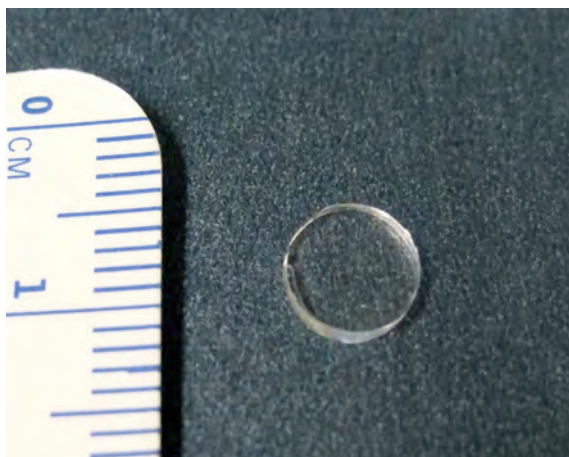

Figure 1S. Sylgard PDMS with DC1107 (10:1:1). Table 2, entry 1

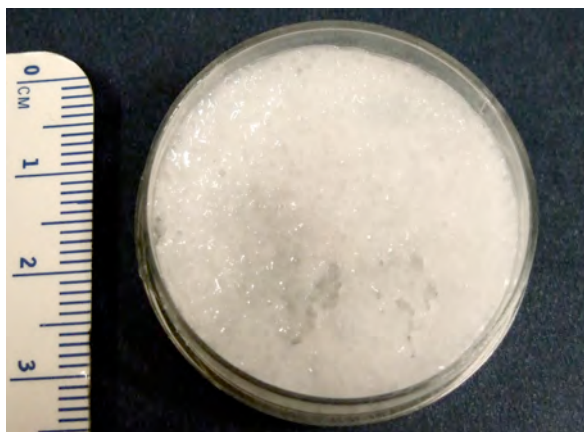

Figure 2S. Sylgard PDMS (with DC1107) with monoallyl-PEG 500 MW 20% w/w cured under a vacuum of 176 Torr. Table 2, entry 2.

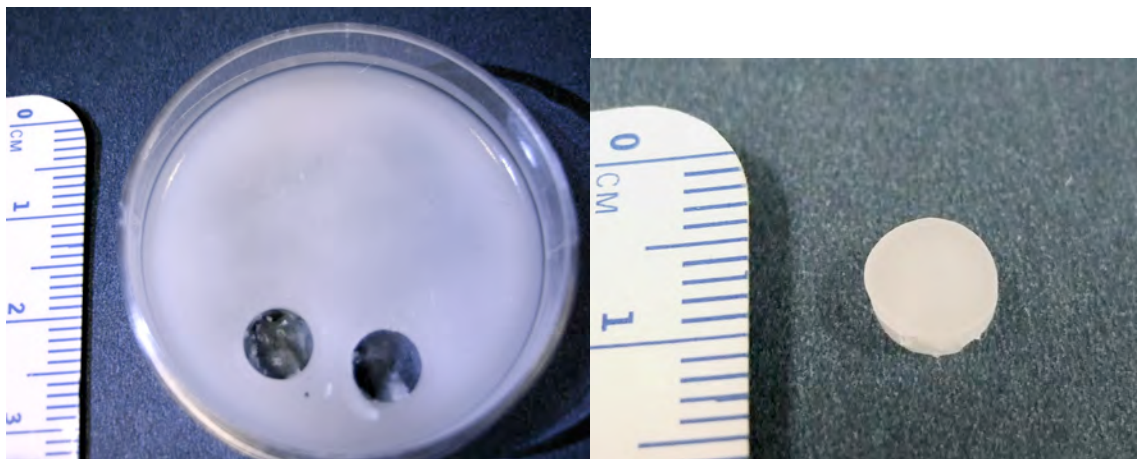

**Figure 3S.** Sylgard PDMS (with DC1107) with hydroxy-PEG 400MW 20% w/w cured under a vacuum of 176 Torr. Table 2, entry 5.

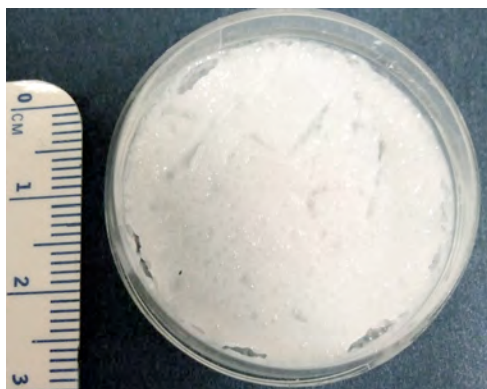

**Figure 4S.** Sylgard PDMS (with DC1107) with diallyl-PEG 500MW 20% w/w cured under 176 Torr. Table 2, entry 6.

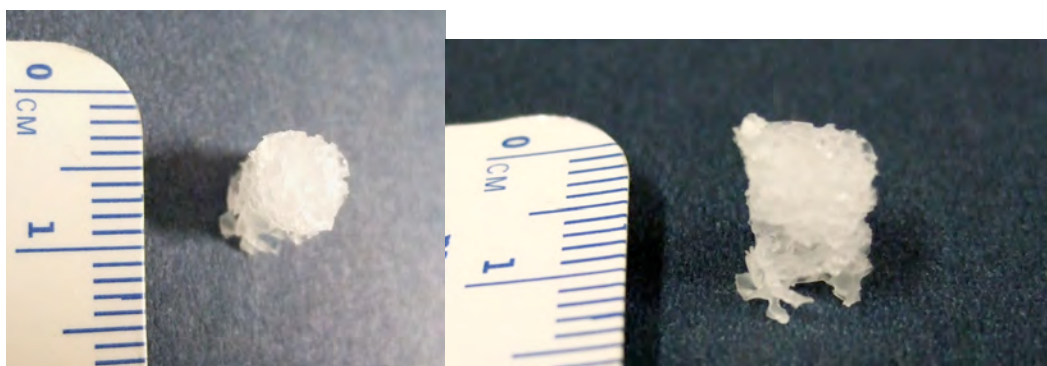

**Figure 5S.** Sylgard PDMS (with DC1107) with monoallyl-PEG 500MW 20%w/w cured under a vacuum of 176 Torr with excess catalyst (14 ppm Pt). Table 2, entry 7.

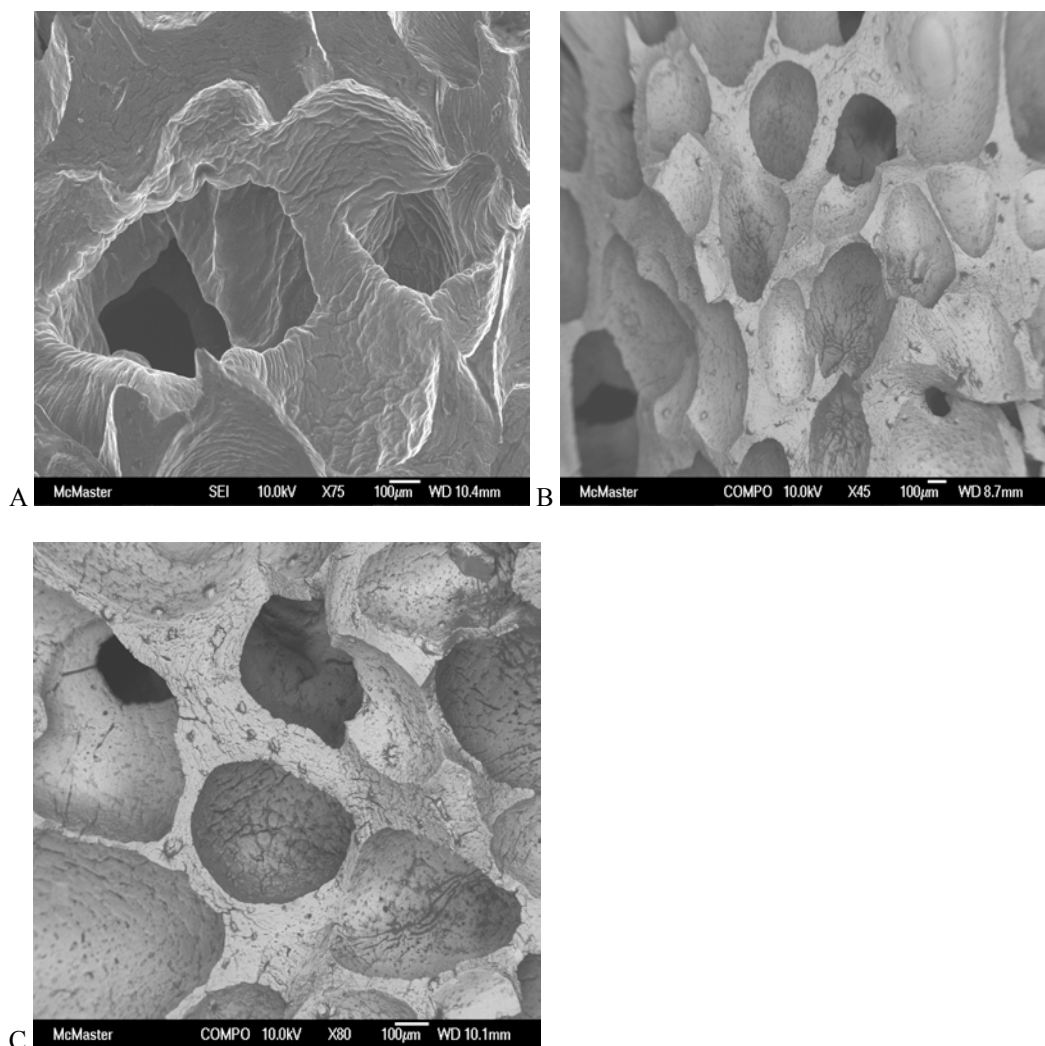

**Figure 6S.** Silicone foams made with monoallyl-PEG MW500 in Sylgard 184 (Table 7, entry 9) A: SEM, B: with backscattering, C: zoom of B.

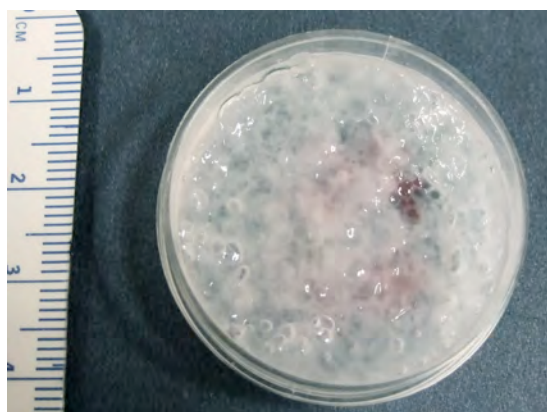

**Figure 7S.** Sylgard PDMS (with DC1107) with monoallyl-PEG 500MW 40% w/w cured under a vacuum of 176 Torr. Table 2, entry 12.

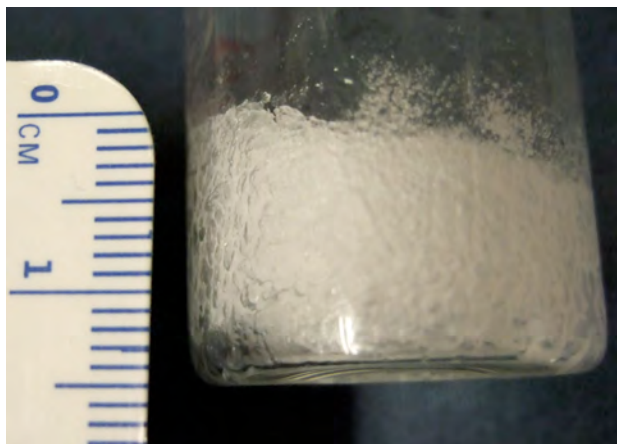

**Figure 8S. Non-Sylgard PDMS with monoallyl-PEG 500MW 20% w/w cured under 749 Torr, 34 ppm Pt. Table 2, entry 17.**

**Figure 9S.  $^1\text{H}$  NMR 1 hour after initial mixing of reagents. Recipe from Table 2, entry 19**

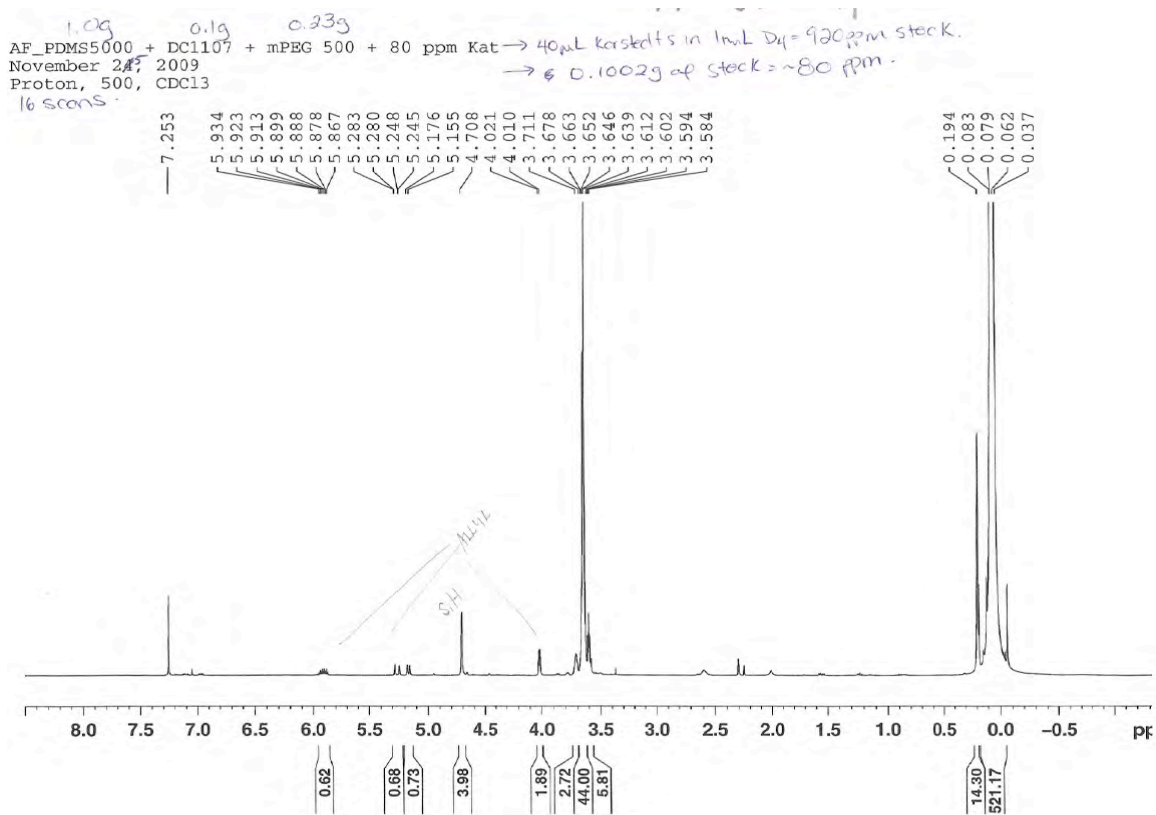

**Figure 10S.  $^1\text{H}$  NMR 2 days after mixing reagents. Recipe from Table 2, entry 19**

AF\_PDMS5000 + DC1107 + mPEG 500 + 80 ppm Kat\_cured3d  
November 27, 2009  
Proton, 500, CDCl<sub>3</sub>

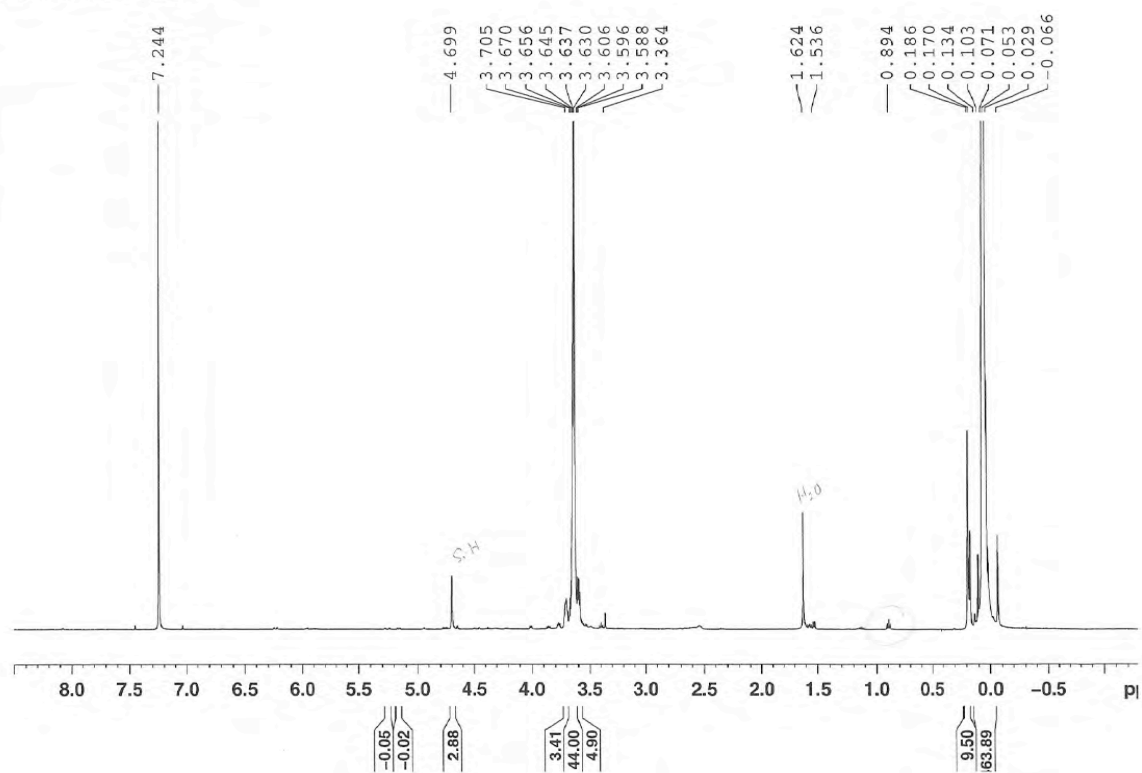



**Figure 11S. Dynamic Viscosity over ~ 30 minutes. Recipe from Table 2, entry 19**

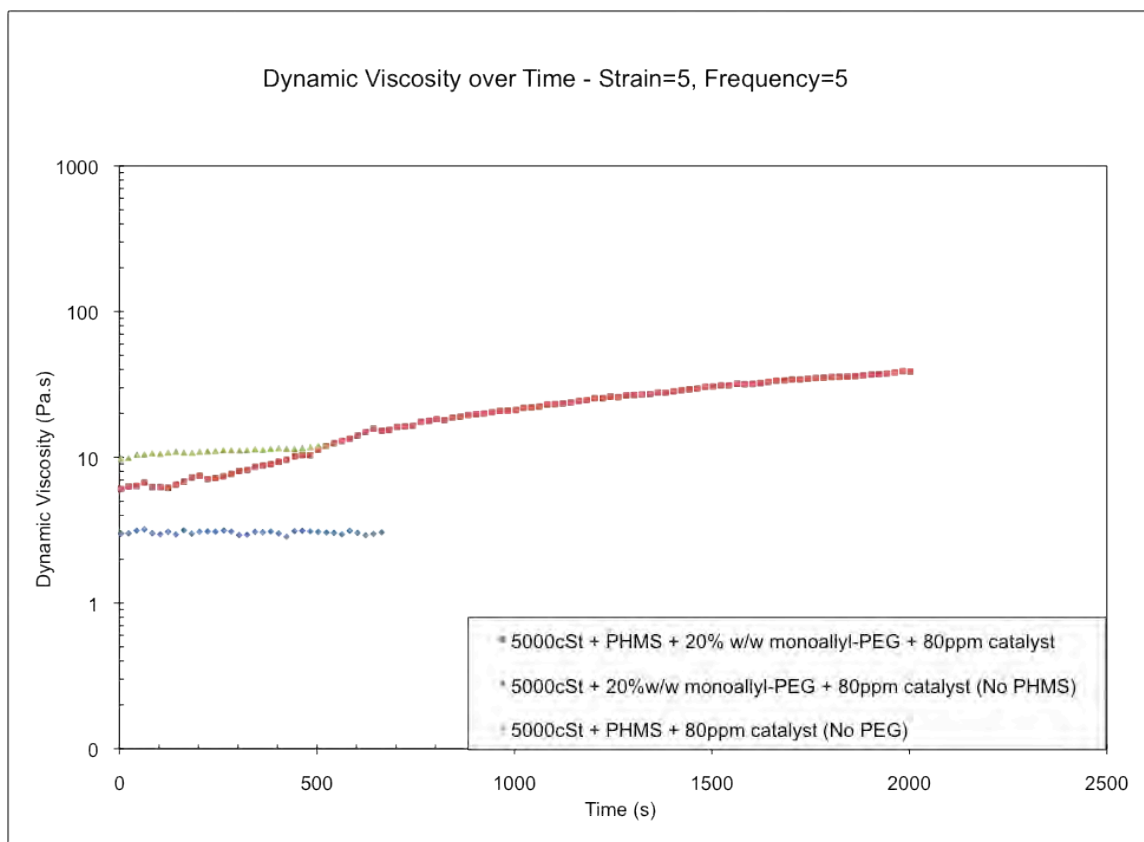

Supplement: b916413h.pdf [file b916413h.pdf]
